# Supplementary material for: Hierarchical architectures of monodisperse porous Cu microspheres: synthesis, growth mechanism, high-efficiency and recyclable catalytic performance
Source: Royal Society of Chemistry journal article supplement (doi:10.1039/c4ta01920b), 2014-06-24
Supplement: c4ta01920b1.pdf [file c4ta01920b1.pdf]

## Electronic Supplementary Information

### **Hierarchical architectures of monodisperse porous Cu microspheres: synthesis, growth mechanism, high-efficiency and recyclable catalytic performance**

*Yu Zhang,<sup>1,2,3</sup> Pengli Zhu,<sup>1,\*</sup> Liang Chen,<sup>1</sup> Gang Li,<sup>1</sup> Fengrui Zhou,<sup>1</sup> Daoqiang (Daniel) Lu,<sup>1,\*</sup> Rong Sun,<sup>1,\*</sup> Feng Zhou,<sup>2</sup> Ching-ping Wong<sup>4,5</sup>*

<sup>1</sup>Shenzhen Institutes of Advanced Technology, Chinese Academy of Sciences, Shenzhen, China,

<sup>2</sup>State Key Laboratory of Solid Lubrication Lanzhou Institute of Chemical Physics, Chinese Academy of Sciences, Lanzhou, China.

<sup>3</sup>Graduate School of Chinese Academy of Sciences, Beijing, China,

<sup>4</sup>School of Materials Science and Engineering, Georgia Institute of Technology, Atlanta, USA,

<sup>5</sup>Department of Electronic Engineering, The Chinese University of Hong Kong, Hong Kong, China

\*E-mail: pl.zhu@siat.ac.cn

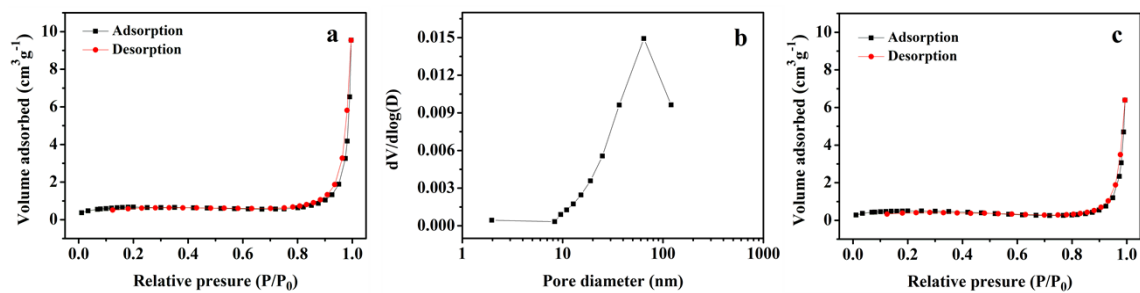

**Fig. S1.** N<sub>2</sub> adsorption/desorption isotherm curve (a) and the pore sizes distribution (b) of the synthesized porous Cu microspheres; N<sub>2</sub> adsorption/desorption isotherm curve of the solid Cu spheres (c).

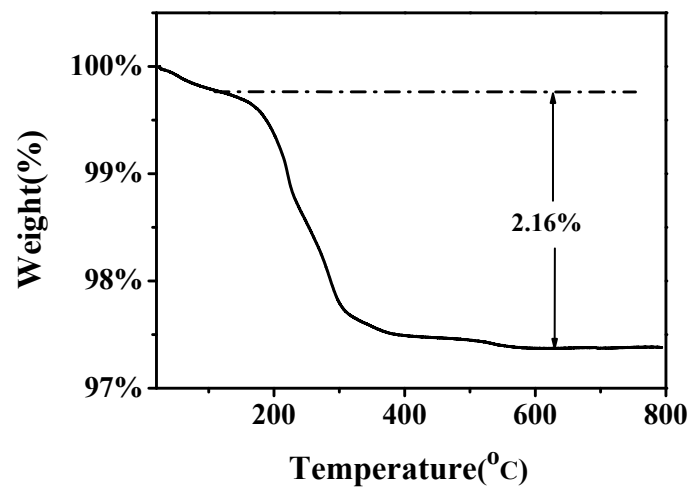

**Fig. S2.** The TG result of synthesized porous Cu microspheres.

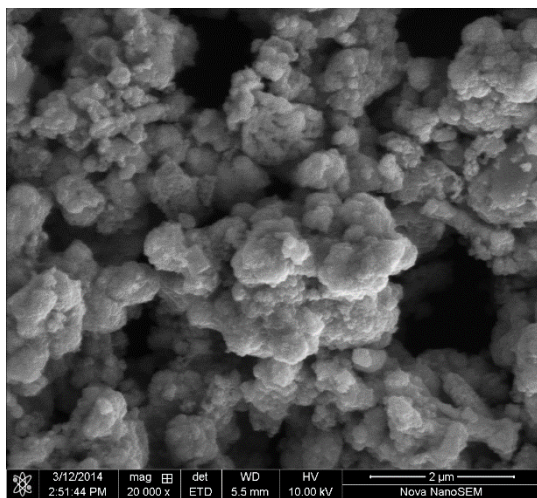

**Fig. S3.** SEM image of the product with copper chloride as precursor.

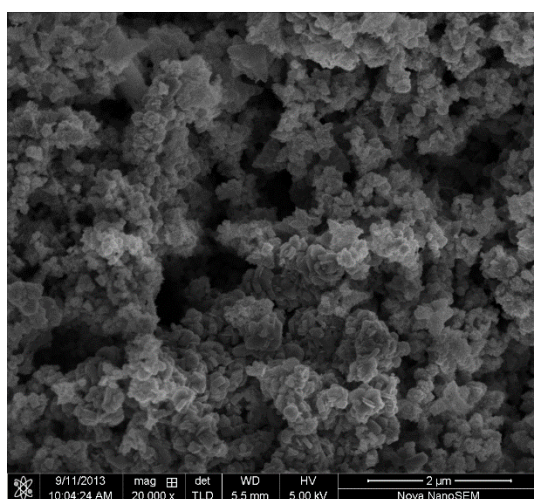

**Fig. S4.** SEM image of the product without PAA.

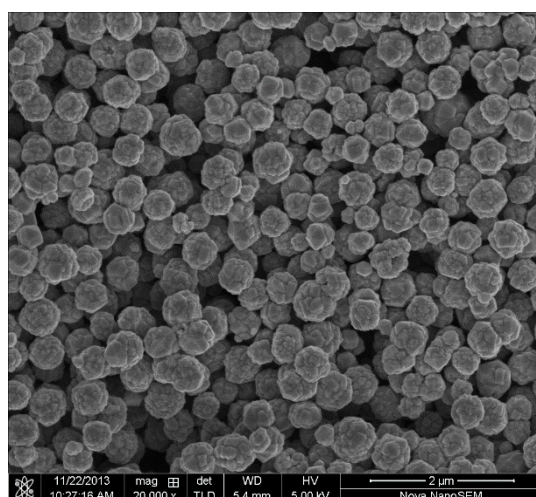

**Fig. S5.** SEM image of prepared solid copper particles.

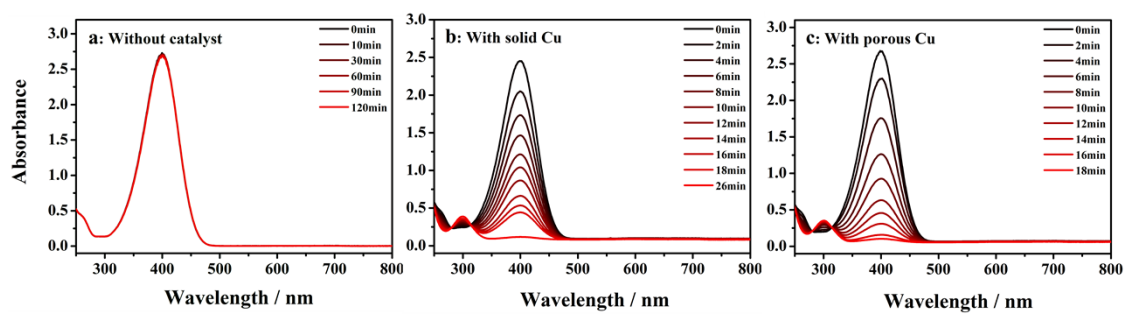

**Fig. S6.** UV-visible absorption spectra of reduction of 4-NP by  $\text{NaBH}_4$  at three different conditions. (a) without catalyst; (b) with solid Cu particles; (c) with porous Cu microspheres.

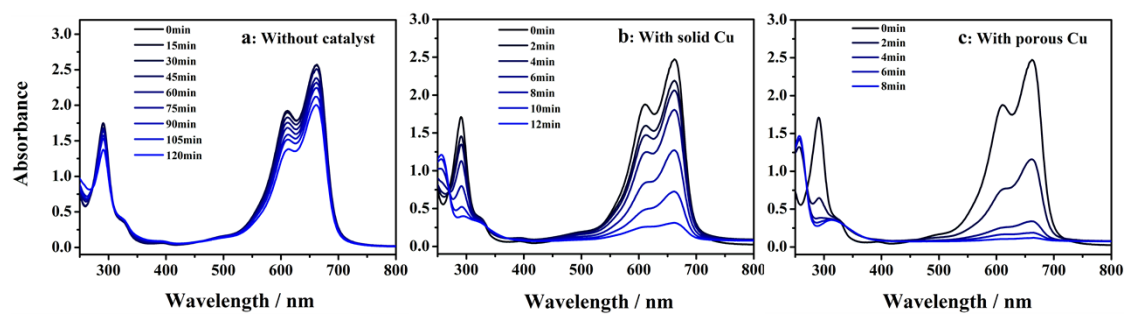

**Fig. S7.** UV-visible absorption spectra of reduction of MB by  $\text{NaBH}_4$  at three different conditions. (a) without catalyst; (b) with solid Cu particles; (c) with porous Cu microspheres.



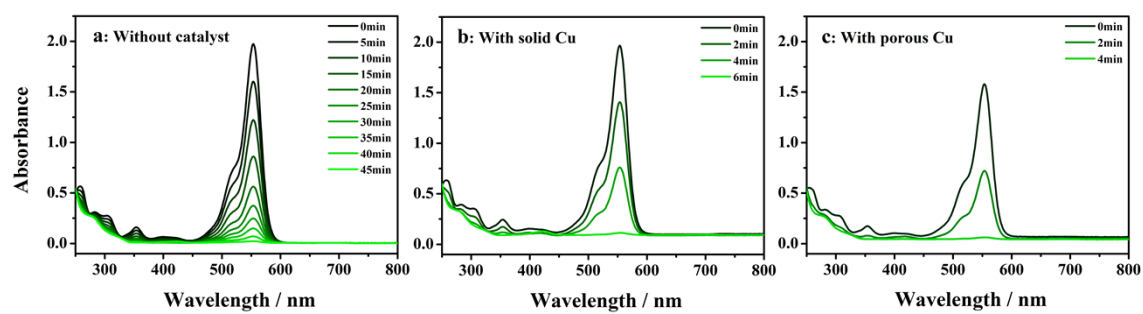

**Fig. S8.** UV-visible absorption spectra of reduction of RhB by  $\text{NaBH}_4$  at three different conditions. (a) without catalyst; (b) with solid Cu particles; (c) with porous Cu microspheres.

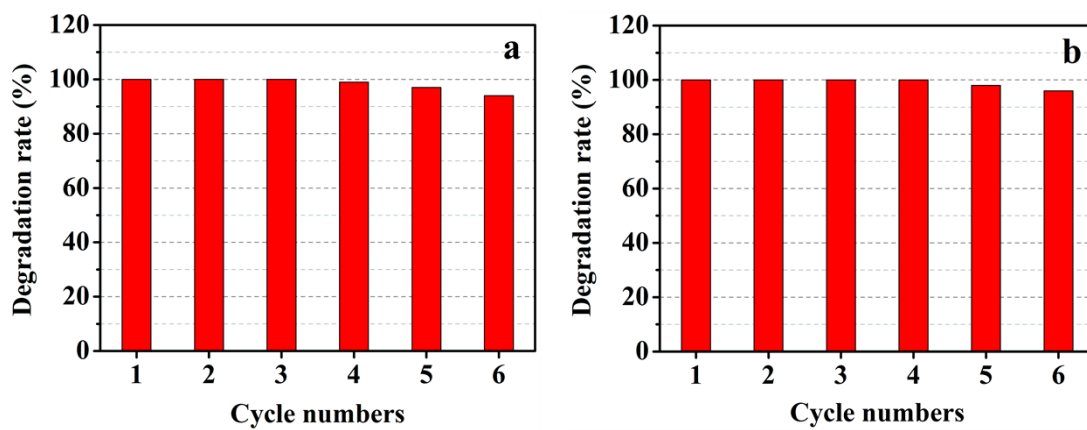

**Fig. S9.** Stability test of the prepared hierarchical porous Cu microspheres in degradation of MB (a) and RhB (b).
